# Supplementary material
Source: HighWire-hosted journal article supplement (https://erj.ersjournals.com/highwire/filestream/132443/field_highwire_adjunct_files/1/ERJ-00412-2016_Supplement.pdf)
Supplement: ERJ-00412-2016_Supplement.pdf [file ERJ-00412-2016_Supplement.pdf]

## **Online Supplement**

### **Title**

Lower lung function associates with cessation of menstruation: UK Biobank data

### **Authors**

André F. S. Amaral, David P. Strachan, Francisco Gómez Real, Peter G. J. Burney, Deborah L. Jarvis

**Supplementary table S1** shows that ever users of hormonal replacement therapy (HRT) were more likely to be ever smokers and heavier than those who have never taken HRT.

**Supplementary table S2** summarizes the characteristics of women from UK Biobank excluded from this study due to low quality of spirometry, and shows that these women were similar to those included in this analyses.

**Supplementary table S3** shows how the differences in lung function between women who had undergone either natural or surgical cessation of menstruation and women still menstruating are explained by demographic (model 1), plus reproductive (model 2), and lifestyle-related characteristics (model 3).

**Supplementary table S4** shows that our main findings are unlikely to be confounded by ethnicity, smoking status, body mass index (BMI), asthma, COPD, or use of HRT. The exception to this is the association of airflow obstruction (FEV1/FVC<LLN) with hysterectomy with or without oophorectomy which seems to be explained by smoking, BMI, and use of HRT.

**Supplementary table S5** shows that among postmenopausal women, the earlier they underwent natural menopause, the lower their FVC. This finding is unlikely to be affected by HRT, smoking or BMI.

**Supplementary table S6** shows that among postmenopausal women, the earlier they underwent natural menopause, the lower their FEV1. This finding is unlikely to be affected by HRT, smoking or BMI.

**Supplementary table S7** shows that among postmenopausal women, the earlier they underwent natural menopause, the higher their risk of spirometric restriction (FVC<LLN). This finding is unlikely to be affected by HRT, smoking or BMI.

**Supplementary table S8** shows that among postmenopausal women there was no clear association of airflow obstruction with age at natural menopause. This finding is unlikely to be affected by HRT, smoking or BMI.

**Supplementary table S9** shows that among women who had hysterectomy, and never used HRT, there was no clear association of lung function (FVC, FEV1, FVC<LLN, FEV1/FVC<LLN) with age at hysterectomy.

**Supplementary table S10** shows that among women who had oophorectomy+hysterectomy, and never used HRT, there was no clear association of lung function (FVC, FEV1, FVC<LLN, FEV1/FVC<LLN) with age at oophorectomy+hysterectomy.

**Supplementary table S1.** Distribution of body mass index and smoking status according to hormonal replacement therapy status.

|                                              | <b>HRT</b>         |                   |
|----------------------------------------------|--------------------|-------------------|
|                                              | <b>Never users</b> | <b>Ever users</b> |
| <b>BMI (kg/m<sup>2</sup>), median (IQR)*</b> | 25.8 (23.2-29.4)   | 26.3 (23.8-29.6)  |
| <b>BMI (kg/m<sup>2</sup>), (%)*</b>          |                    |                   |
| <18.5                                        | 0.6                | 0.4               |
| 18.5-24.99                                   | 41.4               | 35.9              |
| 25.00-29.99                                  | 35.8               | 40.4              |
| 30+                                          | 22.2               | 23.3              |
| <b>Smoking status (%)**</b>                  |                    |                   |
| Lifetime non-smoker                          | 63.3               | 53.9              |
| Ex-smoker                                    | 28.1               | 37.3              |
| Current smoker                               | 8.6                | 8.8               |

IQR, interquartile range. \*1,765 missing. \*\*2,611 missing.

**Supplementary table S2.** Characteristics of women in UK Biobank excluded from this study (with at least two spirograms without cough and back-extrapolated volume <5% FVC (or <150mL if greater), but excluding those with FET ≥6s on best curve (highest FEV1 + FVC)). Women who: 1) used inhaler in the last hour; 2) were unsure whether they had menopause; 3) were pregnant; 4) had gynaecological cancer; and 5) reported an age at menopause <35 or >65 are not included.

|                                                                | Regular menstruation | Irregular menstruation | Natural menopause | Surgical interventions before menopause |                   |                             | Total population  |
|----------------------------------------------------------------|----------------------|------------------------|-------------------|-----------------------------------------|-------------------|-----------------------------|-------------------|
|                                                                |                      |                        |                   | Hysterectomy only                       | Oophorectomy only | Oophorectomy + hysterectomy |                   |
| <b>N</b>                                                       | 18,381               | 3,728                  | 47,152            | 7,126                                   | 142               | 5,710                       | 82,239            |
| <b>Age</b> (years), median (IQR)                               | 45 (43-48)           | 47 (44-50)             | 61 (56-64)        | 60 (55-65)                              | 57 (50-62)        | 61 (55-65)                  | 57 (49-63)        |
| <b>Age at menarche</b> (years), median (IQR)‡                  | 13 (12-14)           | 13 (12-14)             | 13 (12-14)        | 13 (12-14)                              | 13 (12-14)        | 13 (12-14)                  | 13 (12-14)        |
| <b>Age at cessation of menstruation</b> (years), median (IQR)* | -                    | -                      | 50 (48-53)        | 41 (37-45)                              | 42 (37-50)        | 45 (40-50)                  | -                 |
| <b>Ethnicity</b> (%)                                           |                      |                        |                   |                                         |                   |                             |                   |
| White                                                          | 89.5                 | 93.1                   | 94.6              | 93.7                                    | 86.6              | 93.2                        | 93.2              |
| Non-White                                                      | 10.5                 | 6.9                    | 5.4               | 6.3                                     | 13.4              | 6.8                         | 6.8               |
| <b>Standing height</b> (cm), median (IQR)**                    | 164 (160-169)        | 164 (160-169)          | 162 (158-166)     | 162 (158-166)                           | 161 (158-166)     | 162 (158-166)               | 163 (158-167)     |
| <b>BMI</b> (kg/m <sup>2</sup> ), median (IQR)***               | 25.0 (22.4-28.6)     | 25.3 (22.7-29.2)       | 26.1 (23.5-29.6)  | 27.2 (24.4-30.8)                        | 27.2 (24.0-31.1)  | 27.4 (24.5-31.1)            | 26.0 (23.3-29.6)  |
| <b>Oral contraceptive (ever) use</b> (%)†                      | 87.1                 | 89.7                   | 76.9              | 77.9                                    | 73.9              | 76.2                        | 79.8              |
| <b>Hormone replacement therapy</b> (%)π                        |                      |                        |                   |                                         |                   |                             |                   |
| Never used                                                     | 96.9                 | 96.0                   | 57.4              | 42.4                                    | 53.9              | 16.7                        | 63.9              |
| Ex-user                                                        | 1.9                  | 2.7                    | 37.9              | 47.6                                    | 37.6              | 63.9                        | 30.9              |
| Current user                                                   | 1.2                  | 1.3                    | 4.7               | 10.0                                    | 8.5               | 19.4                        | 5.2               |
| <b>Live births</b> (%)÷                                        |                      |                        |                   |                                         |                   |                             |                   |
| 0                                                              | 27.0                 | 25.5                   | 17.8              | 11.7                                    | 19.7              | 16.5                        | 19.6              |
| 1-2                                                            | 54.0                 | 55.7                   | 57.6              | 57.6                                    | 57.8              | 57.2                        | 56.7              |
| 3-4                                                            | 17.7                 | 18.0                   | 22.8              | 28.4                                    | 21.1              | 24.1                        | 22.0              |
| 5+                                                             | 1.3                  | 0.8                    | 1.7               | 2.4                                     | 1.4               | 2.2                         | 1.7               |
| <b>Smoking status</b> (%)****                                  |                      |                        |                   |                                         |                   |                             |                   |
| Lifetime non-smoker                                            | 69.1                 | 69.7                   | 63.3              | 63.7                                    | 69.3              | 63.8                        | 64.9              |
| Ex-smoker                                                      | 21.3                 | 21.3                   | 29.1              | 28.2                                    | 17.1              | 27.8                        | 26.8              |
| Current smoker                                                 | 9.6                  | 9.0                    | 7.6               | 8.1                                     | 13.6              | 8.4                         | 8.3               |
| <b>Pack-years</b> , median (IQR)¥                              | 12.2 (6.8-20.2)      | 13.0 (7.0-21.9)        | 18.0 (9.0-30.0)   | 19.5 (9.8-30.8)                         | 22.0 (10.8-33.9)  | 19.5 (10.0-31.3)            | 16.5 (8.5-28.0)   |
| <b>Townsend deprivation index</b> , median (IQR) €             | -1.8 (-3.5, 1.0)     | -2.05 (-3.6, 0.6)      | -2.2 (-3.7, 0.3)  | -2.2 (-3.7, 0.3)                        | -1.0 (-3.3, 1.9)  | -2.1 (-3.6, 0.6)            | -2.1 (-3.6, 0.5)  |
| <b>FVC</b> (L), median (IQR)                                   | 3.54 (3.11-3.99)     | 3.49 (3.09-3.92)       | 3.05 (2.65-3.48)  | 3.04 (2.62-3.48)                        | 3.06 (2.57-3.55)  | 3.00 (2.58-3.43)            | 3.17 (2.73-3.63)  |
| <b>FVC %predicted</b> , median (IQR)                           | 96.1 (86.1-105.7)    | 95.7 (86.3-105.2)      | 94.0 (83.5-104.6) | 93.3 (82.3-104.0)                       | 91.0 (80.2-102.7) | 92.3 (81.7-102.9)           | 94.4 (84.0-104.7) |
| <b>FEV1</b> (L/s), median (IQR)                                | 2.78 (2.43-3.11)     | 2.74 (2.42-3.08)       | 2.32 (2.00-2.65)  | 2.33 (1.99-2.66)                        | 2.33 (1.81-2.73)  | 2.30 (1.96-2.62)            | 2.43 (2.08-2.80)  |
| <b>FEV1 %predicted</b> , median (IQR)                          | 94.1 (84.2-103.6)    | 94.7 (84.7-104.2)      | 92.8 (81.7-103.2) | 92.4 (80.9-102.7)                       | 89.2 (73.1-100.8) | 91.4 (80.6-102.0)           | 93.0 (82.3-103.2) |
| <b>FVC &lt; LLN</b> (%)                                        | 15.8                 | 15.4                   | 17.8              | 20.0                                    | 22.5              | 21.2                        | 17.7              |
| <b>FEV1/FVC &lt; LLN</b> (%)                                   | 13.1                 | 10.8                   | 13.1              | 12.2                                    | 16.2              | 12.0                        | 12.8              |
| <b>Doctor-diagnosed asthma</b> (%)                             | 10.6                 | 11.0                   | 8.8               | 12.1                                    | 12.9              | 12.0                        | 9.8               |
| <b>Wheeze in last year</b> (%)                                 | 14.9                 | 15.4                   | 15.2              | 20.0                                    | 30.7              | 20.0                        | 15.9              |
| <b>Doctor-diagnosed COPD</b> (%)                               | 0.04                 | 0.05                   | 0.19              | 0.25                                    | 0.70              | 0.30                        | 0.16              |

IQR, interquartile range. ₺2,613 missing (regular: 595; irregular: 140; natural: 1,484; hysterectomy only: 174; oophorectomy only: 2; oophorectomy + hysterectomy: 218). \*3,324 missing (natural: 2,897; hysterectomy only: 214; oophorectomy only: 26; oophorectomy + hysterectomy: 187). \*\*93 missing (regular: 16; irregular: 5; natural: 55; hysterectomy only: 8; oophorectomy + hysterectomy: 9). \*\*\*1,214 missing (regular: 231; irregular: 49; natural: 741; hysterectomy only: 100; oophorectomy only: 4; oophorectomy + hysterectomy: 89). †259 missing (regular: 71; irregular: 15; natural: 134; hysterectomy only: 12; oophorectomy + hysterectomy: 27). ‡327 missing (regular: 86; irregular: 17; natural: 168; hysterectomy only: 32; oophorectomy only: 1; oophorectomy + hysterectomy: 23). †88 missing (regular: 22; irregular: 1; natural: 55; hysterectomy only: 5; oophorectomy + hysterectomy: 5). \*\*\*\*1,552 missing (regular: 277; irregular: 51; natural: 972; hysterectomy only: 150; oophorectomy only: 2; oophorectomy + hysterectomy: 100). ¥10,857 missing (natural: 2,357; irregular: 433; natural: 6,382; hysterectomy only: 898; oophorectomy only: 17; oophorectomy + hysterectomy: 770). €95 missing (regular: 24; irregular: 5; natural: 57; hysterectomy only: 3; oophorectomy + hysterectomy: 6).

**Supplementary table S3.** Association of lung function with menstrual status.

|                          | <b>Unadjusted<br/>(N = 141,076)</b> | <b>Model 1<br/>(N = 140,833)</b> | <b>Model 2<br/>(N = 136,388)</b> | <b>Model 3<br/>(N = 115,848)</b> |
|--------------------------|-------------------------------------|----------------------------------|----------------------------------|----------------------------------|
|                          | <b>Difference (95% CI)</b>          | <b>Difference (95% CI)</b>       | <b>Difference (95% CI)</b>       | <b>Difference (95% CI)</b>       |
| <b>FVC (mL)</b>          |                                     |                                  |                                  |                                  |
| Regular menstruation     | Ref.                                | Ref.                             | Ref.                             | Ref.                             |
| Irregular menstruation   | -53 (-69, -37)                      | -29 (-42, -16)                   | -28 (-41, -15)                   | -17 (-31, -3)                    |
| Natural menopause        | -483 (-491, -475)                   | -51 (-62, -41)                   | -50 (-61, -39)                   | -42 (-53, -30)                   |
| Hysterectomy only        | -493 (-505, -480)                   | -75 (-88, -63)                   | -76 (-89, -64)                   | -51 (-64, -37)                   |
| Oophorectomy only        | -499 (-578, -421)                   | -115 (-178, -51)                 | -120 (-185, -55)                 | -90 (-159, -20)                  |
| Oophorect. + hysterect.  | -519 (-532, -505)                   | -86 (-99, -73)                   | -86 (-100, -72)                  | -54 (-69, -39)                   |
| <b>FEV1 (mL/s)</b>       |                                     |                                  |                                  |                                  |
| Regular menstruation     | Ref.                                | Ref.                             | Ref.                             | Ref.                             |
| Irregular menstruation   | -45 (-58, -31)                      | -18 (-30, -7)                    | -19 (-30, -7)                    | -12 (-24, 0)                     |
| Natural menopause        | -441 (-448, -435)                   | -47 (-56, -38)                   | -45 (-54, -36)                   | -34 (-43, -24)                   |
| Hysterectomy only        | -434 (-444, -424)                   | -53 (-64, -43)                   | -51 (-62, -41)                   | -32 (-43, -20)                   |
| Oophorectomy only        | -409 (-473, -345)                   | -65 (-119, -12)                  | -66 (-121, -12)                  | -46 (-105, 12)                   |
| Oophorect. + hysterect.  | -456 (-467, -445)                   | -63 (-74, -52)                   | -57 (-69, -45)                   | -33 (-46, -21)                   |
|                          | <b>OR (95% CI)</b>                  | <b>OR (95% CI)</b>               | <b>OR (95% CI)</b>               | <b>OR (95% CI)</b>               |
| <b>FVC &lt; LLN</b>      |                                     |                                  |                                  |                                  |
| Regular menstruation     | Ref.                                | Ref.                             | Ref.                             | Ref.                             |
| Irregular menstruation   | 1.10 (1.01-1.19)                    | 1.20 (1.10-1.31)                 | 1.19 (1.09-1.30)                 | 1.16 (1.05-1.28)                 |
| Natural menopause        | 1.30 (1.25-1.36)                    | 1.33 (1.25-1.42)                 | 1.33 (1.24-1.42)                 | 1.27 (1.18-1.37)                 |
| Hysterectomy only        | 1.44 (1.36-1.53)                    | 1.46 (1.35-1.58)                 | 1.47 (1.36-1.60)                 | 1.31 (1.20-1.43)                 |
| Oophorectomy only        | 2.06 (1.49-2.84)                    | 1.93 (1.37-2.71)                 | 2.01 (1.42-2.84)                 | 1.69 (1.14-2.50)                 |
| Oophorect. + hysterect.  | 1.52 (1.43-1.62)                    | 1.54 (1.42-1.67)                 | 1.57 (1.44-1.71)                 | 1.36 (1.24-1.50)                 |
| <b>FEV1/FVC &lt; LLN</b> |                                     |                                  |                                  |                                  |
| Regular menstruation     | Ref.                                | Ref.                             | Ref.                             | Ref.                             |
| Irregular menstruation   | 0.89 (0.80-0.98)                    | 0.94 (0.84-1.04)                 | 0.95 (0.85-1.05)                 | 0.95 (0.85-1.06)                 |
| Natural menopause        | 0.97 (0.93-1.02)                    | 1.15 (1.06-1.25)                 | 1.14 (1.04-1.23)                 | 1.03 (0.94-1.13)                 |
| Hysterectomy only        | 0.82 (0.76-0.89)                    | 0.94 (0.85-1.03)                 | 0.90 (0.82-1.00)                 | 0.86 (0.77-0.96)                 |
| Oophorectomy only        | 0.50 (0.26-0.94)                    | 0.56 (0.30-1.07)                 | 0.58 (0.31-1.11)                 | 0.64 (0.33-1.23)                 |
| Oophorect. + hysterect.  | 0.87 (0.80-0.95)                    | 1.00 (0.90-1.11)                 | 0.93 (0.84-1.04)                 | 0.87 (0.77-0.98)                 |

Model 1: Adjusted for centre, age, ethnicity, standing height, and Townsend deprivation index. Model 2: Model 1 plus age at menarche, oral contraceptive use, hormone replacement therapy use, and number of live births. Model 3: Model 2 plus smoking status, pack-years, and body mass index.

**Supplementary table S4.** Association of lung function with menstrual status, after sensitivity analysis.

|                                       | White ethnicity<br>(N = 110,475) | Lifetime non-smoker<br>(N = 78,739) | 18.5 to 29.99 kg/m <sup>2</sup><br>(N = 88,555) | Without asthma/COPD<br>(N = 101,519) | Never used HRT<br>(N = 71,397) | White ethnicity + lifetime non-smoker + 18.5<br>to 29.99 kg/m <sup>2</sup> + without asthma/COPD +<br>never used HRT<br>(N = 33,406) |
|---------------------------------------|----------------------------------|-------------------------------------|-------------------------------------------------|--------------------------------------|--------------------------------|--------------------------------------------------------------------------------------------------------------------------------------|
|                                       | Difference (95% CI)              | Difference (95% CI)                 | Difference (95% CI)                             | Difference (95% CI)                  | Difference (95% CI)            | Difference (95% CI)                                                                                                                  |
| <b>FVC (mL)</b>                       |                                  |                                     |                                                 |                                      |                                |                                                                                                                                      |
| Regular menstruation                  | Ref.                             | Ref.                                | Ref.                                            | Ref.                                 | Ref.                           | Ref.                                                                                                                                 |
| Irregular menstruation                | -22 (-36, -7)                    | -20 (-37, -4)                       | -15 (-31, 1)                                    | -18 (-33, -3)                        | -19 (-34, -5)                  | -29 (-50, -8)                                                                                                                        |
| Natural menopause                     | -41 (-52, -29)                   | -40 (-54, -27)                      | -45 (-58, -32)                                  | -39 (-51, -27)                       | -42 (-55, -29)                 | -38 (-58, -19)                                                                                                                       |
| Hysterectomy only                     | -49 (-63, -35)                   | -49 (-65, -32)                      | -55 (-71, -39)                                  | -49 (-63, -34)                       | -58 (-75, -40)                 | -61 (-88, -34)                                                                                                                       |
| Oophorectomy only                     | -101 (-173, -28)                 | -75 (-163, 12)                      | -109 (-191, -26)                                | -74 (-148, 0)                        | -136 (-234, -38)               | -118 (-277, 40)                                                                                                                      |
| Oophorect. + hysterect.               | -52 (-67, -36)                   | -50 (-68, -32)                      | -57 (-74, -39)                                  | -54 (-70, -38)                       | -59 (-87, -30)                 | -60 (-106, -14)                                                                                                                      |
| <b>FEV1 (mL/s)</b>                    |                                  |                                     |                                                 |                                      |                                |                                                                                                                                      |
| Regular menstruation                  | Ref.                             | Ref.                                | Ref.                                            | Ref.                                 | Ref.                           | Ref.                                                                                                                                 |
| Irregular menstruation                | -16 (-29, -4)                    | -13 (-27, 1)                        | -11 (-25, 2)                                    | -12 (-24, 1)                         | -14 (-26, -2)                  | -21 (-38, -4)                                                                                                                        |
| Natural menopause                     | -32 (-42, -22)                   | -29 (-40, -17)                      | -37 (-48, -26)                                  | -32 (-42, -22)                       | -36 (-48, -25)                 | -27 (-43, -10)                                                                                                                       |
| Hysterectomy only                     | -31 (-42, -19)                   | -27 (-41, -13)                      | -36 (-49, -22)                                  | -31 (-43, -19)                       | -44 (-58, -29)                 | -42 (-64, -20)                                                                                                                       |
| Oophorectomy only                     | -55 (-116, -19)                  | -37 (-110, 36)                      | -52 (-122, 17)                                  | -32 (-94, 29)                        | -68 (-150, 15)                 | -52 (-182, 78)                                                                                                                       |
| Oophorect. + hysterect.               | -31 (-44, -18)                   | -28 (-43, -13)                      | -36 (-51, -22)                                  | -35 (-48, -22)                       | -38 (-62, -13)                 | -34 (-71, 4)                                                                                                                         |
|                                       | <b>OR (95% CI)</b>               | <b>OR (95% CI)</b>                  | <b>OR (95% CI)</b>                              | <b>OR (95% CI)</b>                   | <b>OR (95% CI)</b>             | <b>OR (95% CI)</b>                                                                                                                   |
| <b>FVC &lt; LLN (NHANES III)</b>      |                                  |                                     |                                                 |                                      |                                |                                                                                                                                      |
| Regular menstruation                  | Ref.                             | Ref.                                | Ref.                                            | Ref.                                 | Ref.                           | Ref.                                                                                                                                 |
| Irregular menstruation                | 1.21 (1.09-1.33)                 | 1.13 (1.01-1.27)                    | 1.15 (1.03-1.30)                                | 1.17 (1.05-1.30)                     | 1.17 (1.06-1.29)               | 1.19 (1.00-1.40)                                                                                                                     |
| Natural menopause                     | 1.27 (1.17-1.38)                 | 1.24 (1.14-1.36)                    | 1.33 (1.21-1.46)                                | 1.27 (1.17-1.38)                     | 1.27 (1.17-1.39)               | 1.32 (1.13-1.54)                                                                                                                     |
| Hysterectomy only                     | 1.31 (1.19-1.44)                 | 1.24 (1.11-1.38)                    | 1.35 (1.21-1.50)                                | 1.28 (1.16-1.41)                     | 1.33 (1.20-1.49)               | 1.28 (1.04-1.58)                                                                                                                     |
| Oophorectomy only                     | 1.84 (1.22-2.77)                 | 1.23 (0.72-2.12)                    | 1.96 (1.22-3.14)                                | 1.61 (1.04-2.50)                     | 1.74 (1.01-2.99)               | 1.23 (0.37-4.10)                                                                                                                     |
| Oophorect. + hysterect.               | 1.36 (1.23, 1.50)                | 1.29 (1.14-1.45)                    | 1.41 (1.25-1.59)                                | 1.39 (1.25-1.54)                     | 1.34 (1.13-1.58)               | 1.28 (0.91-1.80)                                                                                                                     |
| <b>FEV1/FVC &lt; LLN (NHANES III)</b> |                                  |                                     |                                                 |                                      |                                |                                                                                                                                      |
| Regular menstruation                  | Ref.                             | Ref.                                | Ref.                                            | Ref.                                 | Ref.                           | Ref.                                                                                                                                 |
| Irregular menstruation                | 0.96 (0.85-1.08)                 | 0.94 (0.81-1.08)                    | 0.96 (0.85-1.09)                                | 0.93 (0.80-1.07)                     | 0.95 (0.85-1.07)               | 0.93 (0.77-1.14)                                                                                                                     |
| Natural menopause                     | 1.02 (0.93-1.13)                 | 1.01 (0.90-1.14)                    | 1.06 (0.96-1.17)                                | 1.03 (0.92-1.15)                     | 1.04 (0.93-1.15)               | 0.97 (0.80-1.18)                                                                                                                     |
| Hysterectomy only                     | 0.87 (0.77-0.97)                 | 0.87 (0.74-1.01)                    | 0.89 (0.78-1.00)                                | 0.83 (0.73-0.96)                     | 1.01 (0.88-1.17)               | 0.97 (0.74-1.28)                                                                                                                     |
| Oophorectomy only                     | 0.61 (0.30-1.21)                 | 0.58 (0.21-1.59)                    | 0.64 (0.30-1.33)                                | 0.48 (0.19-1.19)                     | 0.78 (0.33-1.83)               | 0.53 (0.07-3.93)                                                                                                                     |
| Oophorect. + hysterect.               | 0.86 (0.76-0.98)                 | 0.87 (0.73-1.03)                    | 0.94 (0.82-1.07)                                | 0.86 (0.74-1.00)                     | 0.92 (0.72-1.17)               | 1.05 (0.66-1.66)                                                                                                                     |

Model 3: Adjusted for centre, age, ethnicity, standing height, Townsend deprivation index, age at menarche, oral contraceptive use, hormone replacement therapy use, number of live births, smoking status, pack-years, and body mass index.

**Supplementary table S5.** Association of forced vital capacity (FVC) with age at natural menopause, by age group.

|                                                                           | 40-55 years                    |                     | 56-59 years     |                     | 60-62 years   |                     | 63-65 years     |                     | 66-70 years                    |                     |
|---------------------------------------------------------------------------|--------------------------------|---------------------|-----------------|---------------------|---------------|---------------------|-----------------|---------------------|--------------------------------|---------------------|
|                                                                           | N                              | Difference (95% CI) | N               | Difference (95% CI) | N             | Difference (95% CI) | N               | Difference (95% CI) | N                              | Difference (95% CI) |
| <b>FVC (mL)</b>                                                           |                                |                     |                 |                     |               |                     |                 |                     |                                |                     |
| Natural menopause at <45 years                                            | 1976                           | -48 (-74, -22)      | 1041            | -52 (-82, -22)      | 1053          | -36 (-65, -7)       | 1010            | -23 (-53, 6)        | 1000                           | -41 (-71, -12)      |
| Natural menopause at 45-47 years                                          | 2324                           | -25 (-48, -2)       | 1282            | -23 (-51, 4)        | 1297          | -5 (-32, 21)        | 1105            | -1 (-29, 27)        | 1284                           | -12 (-39, 14)       |
| Natural menopause at 48-53 years                                          | 9788                           | Ref.                | 8174            | Ref.                | 7309          | Ref.                | 5779            | Ref.                | 5743                           | Ref.                |
| Natural menopause at 54-55 years                                          | 703                            | 10 (-27, 48)        | 2612            | 0 (-20, 20)         | 2351          | -16 (-37, 4)        | 1831            | 7 (-16, 30)         | 1498                           | -10 (-35, 15)       |
| Natural menopause at 56+ years                                            | -                              | -                   | 1147            | -5 (-34, 23)        | 1710          | -9 (-32, 15)        | 1393            | 21 (-5, 46)         | 1296                           | 8 (-18, 35)         |
|                                                                           | p-trend = 4.5x10 <sup>-6</sup> |                     | p-trend = 0.004 |                     | p-trend = 0.3 |                     | p-trend = 0.006 |                     | p-trend = 5.7x10 <sup>-4</sup> |                     |
| <b>FVC (mL) – excluding HRT ever users</b>                                |                                |                     |                 |                     |               |                     |                 |                     |                                |                     |
| Natural menopause at <45 years                                            | 992                            | -71 (-107, -35)     | 332             | -70 (-121, -18)     | 361           | -36 (-85, 12)       | 373             | -27 (-74, 21)       | 508                            | -49 (-91, -7)       |
| Natural menopause at 45-47 years                                          | 1656                           | -24 (-51, 3)        | 638             | -36 (-74, 2)        | 558           | -15 (-55, 25)       | 474             | 5 (-37, 48)         | 623                            | -2 (-41, 36)        |
| Natural menopause at 48-53 years                                          | 7773                           | Ref.                | 5189            | Ref.                | 3881          | Ref.                | 2745            | Ref.                | 2859                           | Ref.                |
| Natural menopause at 54-55 years                                          | 573                            | 35 (-8, 78)         | 1765            | -2 (-27, 22)        | 1223          | -30 (-58, -1)       | 845             | 22 (-12, 55)        | 696                            | 30 (-7, 67)         |
| Natural menopause at 56+ years                                            | -                              | -                   | 791             | -5 (-39, 30)        | 877           | -9 (-42, 24)        | 621             | 35 (-3, 73)         | 561                            | 25 (-16, 65)        |
|                                                                           | p-trend = 8.2x10 <sup>-7</sup> |                     | p-trend = 0.03  |                     | p-trend = 1.0 |                     | p-trend = 0.03  |                     | p-trend = 8.4x10 <sup>-5</sup> |                     |
| <b>FVC (mL) – excluding HRT ever users and ever smokers</b>               |                                |                     |                 |                     |               |                     |                 |                     |                                |                     |
| Natural menopause at <45 years                                            | 613                            | -48 (-92, -3)       | 200             | -79 (-144, -13)     | 224           | 2 (-59, 62)         | 214             | -6 (-67, 56)        | 303                            | -11 (-64, 42)       |
| Natural menopause at 45-47 years                                          | 1132                           | -22 (-55, 11)       | 422             | -26 (-73, 20)       | 346           | -17 (-67, 33)       | 311             | 24 (-27, 76)        | 412                            | -12 (-58, 35)       |
| Natural menopause at 48-53 years                                          | 5537                           | Ref.                | 3710            | Ref.                | 2770          | Ref.                | 1891            | Ref.                | 2059                           | Ref.                |
| Natural menopause at 54-55 years                                          | 433                            | 31 (-18, 80)        | 1326            | -11 (-40, 18)       | 918           | -36 (-70, -3)       | 613             | 32 (-7, 71)         | 512                            | 17 (-25, 60)        |
| Natural menopause at 56+ years                                            | -                              | -                   | 590             | -2 (-42, 38)        | 653           | -18 (-56, 20)       | 465             | 42 (-2, 86)         | 434                            | 29 (-17, 74)        |
|                                                                           | p-trend = 0.004                |                     | p-trend = 0.2   |                     | p-trend = 0.2 |                     | p-trend = 0.2   |                     | p-trend = 0.02                 |                     |
| <b>FVC (mL) – excluding HRT ever users, ever smokers, and extreme BMI</b> |                                |                     |                 |                     |               |                     |                 |                     |                                |                     |
| Natural menopause at <45 years                                            | 454                            | -47 (-98, 5)        | 149             | -81 (-157, -5)      | 160           | 14 (-57, 85)        | 147             | 12 (-61, 85)        | 210                            | -14 (-78, 51)       |
| Natural menopause at 45-47 years                                          | 885                            | -25 (-63, 12)       | 326             | -37 (-89, 16)       | 275           | -17 (-72, 39)       | 236             | -9 (-68, 50)        | 324                            | -9 (-62, 45)        |
| Natural menopause at 48-53 years                                          | 4380                           | Ref.                | 2953            | Ref.                | 2153          | Ref.                | 1482            | Ref.                | 1608                           | Ref.                |
| Natural menopause at 54-55 years                                          | 341                            | 33 (-23, 88)        | 1055            | -3 (-35, 29)        | 705           | -29 (-67, 8)        | 474             | 40 (-4, 85)         | 386                            | 6 (-44, 56)         |
| Natural menopause at 56+ years                                            | -                              | -                   | 446             | 19 (-27, 65)        | 473           | -10 (-54, 34)       | 325             | 23 (-29, 75)        | 326                            | 22 (-32, 75)        |
|                                                                           | p-trend = 0.007                |                     | p-trend = 0.07  |                     | p-trend = 0.4 |                     | p-trend = 0.4   |                     | p-trend = 0.1                  |                     |

Model 3: Adjusted for centre, age, ethnicity, standing height, Townsend deprivation index, age at menarche, oral contraceptive use, hormone replacement therapy use, number of live births, smoking status, pack-years, and body mass index. Reference group: Women with natural menopause at age 48-53. *P*-trend is from model with age at menopause as continuous variable.

**Supplementary table S6.** Association of forced expiratory volume in 1 second (FEV1) with age at natural menopause, by age group.

|                                                                              | 40-55 years                    |                     | 56-59 years     |                     | 60-62 years    |                     | 63-65 years                    |                     | 66-70 years                    |                     |
|------------------------------------------------------------------------------|--------------------------------|---------------------|-----------------|---------------------|----------------|---------------------|--------------------------------|---------------------|--------------------------------|---------------------|
|                                                                              | N                              | Difference (95% CI) | N               | Difference (95% CI) | N              | Difference (95% CI) | N                              | Difference (95% CI) | N                              | Difference (95% CI) |
| <b>FEV1 (mL/s)</b>                                                           |                                |                     |                 |                     |                |                     |                                |                     |                                |                     |
| Natural menopause at <45 years                                               | 1976                           | -41 (-63, -19)      | 1041            | -44 (-69, -19)      | 1053           | -36 (-60, -11)      | 1010                           | -24 (-49, 1)        | 1000                           | -30 (-55, -5)       |
| Natural menopause at 45-47 years                                             | 2324                           | -26 (-45, -7)       | 1282            | -11 (-34, 12)       | 1297           | -3 (-25, 19)        | 1105                           | -13 (-37, 11)       | 1284                           | -15 (-38, 8)        |
| Natural menopause at 48-53 years                                             | 9788                           | Ref.                | 8174            | Ref.                | 7309           | Ref.                | 5779                           | Ref.                | 5743                           | Ref.                |
| Natural menopause at 54-55 years                                             | 703                            | -2 (-33, 30)        | 2612            | 6 (-11, 23)         | 2351           | -13 (-31, 4)        | 1831                           | 2 (-18, 21)         | 1498                           | -2 (-23, 20)        |
| Natural menopause at 56+ years                                               | -                              | -                   | 1147            | -4 (-29, 20)        | 1710           | -3 (-23, 17)        | 1393                           | 19 (-3, 40)         | 1296                           | 6 (-17, 28)         |
|                                                                              | p-trend = 1.1x10 <sup>-5</sup> |                     | p-trend = 0.002 |                     | p-trend = 0.05 |                     | p-trend = 6.2x10 <sup>-4</sup> |                     | p-trend = 6.9x10 <sup>-4</sup> |                     |
| <b>FEV1 (mL/s) – excluding HRT ever users</b>                                |                                |                     |                 |                     |                |                     |                                |                     |                                |                     |
| Natural menopause at <45 years                                               | 992                            | -54 (-84, -25)      | 332             | -57 (-100, -14)     | 361            | -38 (-78, 3)        | 373                            | -26 (-66, 14)       | 508                            | -49 (-85, -14)      |
| Natural menopause at 45-47 years                                             | 1656                           | -24 (-47, -2)       | 638             | -19 (-51, 12)       | 558            | -17 (-51, 16)       | 474                            | -13 (-49, 23)       | 623                            | -10 (-43, 22)       |
| Natural menopause at 48-53 years                                             | 7773                           | Ref.                | 5189            | Ref.                | 3881           | Ref.                | 2745                           | Ref.                | 2859                           | Ref.                |
| Natural menopause at 54-55 years                                             | 573                            | 17 (-18, 53)        | 1765            | 3 (-17, 24)         | 1223           | -20 (-44, 4)        | 845                            | 8 (-20, 37)         | 696                            | 25 (-6, 56)         |
| Natural menopause at 56+ years                                               | -                              | -                   | 791             | -2 (-31, 27)        | 877            | -3 (-30, 25)        | 621                            | 36 (3, 68)          | 561                            | 21 (-13, 55)        |
|                                                                              | p-trend = 6.6x10 <sup>-6</sup> |                     | p-trend = 0.01  |                     | p-trend = 0.3  |                     | p-trend = 0.005                |                     | p-trend = 1.5x10 <sup>-5</sup> |                     |
| <b>FEV1 (mL/s) – excluding HRT ever users and ever smokers</b>               |                                |                     |                 |                     |                |                     |                                |                     |                                |                     |
| Natural menopause at <45 years                                               | 613                            | -38 (-75, -1)       | 200             | -73 (-128, -18)     | 224            | -2 (-52, 48)        | 214                            | -9 (-60, 42)        | 303                            | -10 (-54, 35)       |
| Natural menopause at 45-47 years                                             | 1132                           | -18 (-45, 9)        | 422             | -1 (-39, 38)        | 346            | -21 (-62, 20)       | 311                            | 15 (-28, 59)        | 412                            | -7 (-46, 32)        |
| Natural menopause at 48-53 years                                             | 5537                           | Ref.                | 3710            | Ref.                | 2770           | Ref.                | 1891                           | Ref.                | 2059                           | Ref.                |
| Natural menopause at 54-55 years                                             | 433                            | 11 (-30, 51)        | 1326            | -7 (-32, 17)        | 918            | -27 (-54, 1)        | 613                            | 20 (-13, 53)        | 512                            | 18 (-18, 54)        |
| Natural menopause at 56+ years                                               | -                              | -                   | 590             | -1 (-35, 32)        | 653            | -12 (-43, 20)       | 465                            | 39 (2, 76)          | 434                            | 28 (-10, 67)        |
|                                                                              | p-trend = 0.008                |                     | p-trend = 0.2   |                     | p-trend = 0.6  |                     | p-trend = 0.1                  |                     | p-trend = 0.02                 |                     |
| <b>FEV1 (mL/s) – excluding HRT ever users, ever smokers, and extreme BMI</b> |                                |                     |                 |                     |                |                     |                                |                     |                                |                     |
| Natural menopause at <45 years                                               | 454                            | -37 (-80, 6)        | 149             | -72 (-134, -9)      | 160            | 8 (-51, 68)         | 147                            | 0 (-61, 61)         | 210                            | -6 (-60, 48)        |
| Natural menopause at 45-47 years                                             | 885                            | -20 (-51, 11)       | 326             | -13 (-57, 30)       | 275            | -19 (-65, 27)       | 236                            | -8 (-57, 41)        | 324                            | -4 (-49, 40)        |
| Natural menopause at 48-53 years                                             | 4380                           | Ref.                | 2953            | Ref.                | 2153           | Ref.                | 1482                           | Ref.                | 1608                           | Ref.                |
| Natural menopause at 54-55 years                                             | 341                            | 11 (-35, 57)        | 1055            | -1 (-28, 26)        | 705            | -21 (-52, 11)       | 474                            | 30 (-7, 67)         | 386                            | 7 (-35, 48)         |
| Natural menopause at 56+ years                                               | -                              | -                   | 446             | 10 (-28, 48)        | 473            | -4 (-41, 33)        | 325                            | 18 (-25, 62)        | 326                            | 23 (-21, 68)        |
|                                                                              | p-trend = 0.02                 |                     | p-trend = 0.1   |                     | p-trend = 0.8  |                     | p-trend = 0.3                  |                     | p-trend = 0.1                  |                     |

Model 3: Adjusted for centre, age, ethnicity, standing height, Townsend deprivation index, age at menarche, oral contraceptive use, hormone replacement therapy use, number of live births, smoking status, pack-years, and body mass index. Reference group: Women with natural menopause at age 48-53. P-trend is from model with age at menopause as continuous variable.

**Supplementary table S7.** Association of spirometric restriction (FVC<LLN) with age at natural menopause, by age group.

|                                                                               | 40-55 years    |                  | 56-59 years                    |                  | 60-62 years   |                  | 63-65 years    |                  | 66-70 years                    |                  |
|-------------------------------------------------------------------------------|----------------|------------------|--------------------------------|------------------|---------------|------------------|----------------|------------------|--------------------------------|------------------|
|                                                                               | N              | OR (95% CI)      | N                              | OR (95% CI)      | N             | OR (95% CI)      | N              | OR (95% CI)      | N                              | OR (95% CI)      |
| <b>FVC &lt; LLN</b>                                                           |                |                  |                                |                  |               |                  |                |                  |                                |                  |
| Natural menopause at <45 years                                                | 1976           | 1.05 (0.90-1.23) | 1041                           | 1.40 (1.18-1.66) | 1053          | 1.21 (1.02-1.44) | 1010           | 1.15 (0.95-1.38) | 1000                           | 1.19 (0.99-1.43) |
| Natural menopause at 45-47 years                                              | 2324           | 1.12 (0.98-1.28) | 1282                           | 1.06 (0.89-1.25) | 1297          | 1.02 (0.86-1.20) | 1105           | 1.06 (0.88-1.27) | 1284                           | 1.08 (0.91-1.28) |
| Natural menopause at 48-53 years                                              | 9788           | Ref.             | 8174                           | Ref.             | 7309          | Ref.             | 5779           | Ref.             | 5743                           | Ref.             |
| Natural menopause at 54-55 years                                              | 703            | 0.92 (0.73-1.17) | 2612                           | 0.92 (0.81-1.05) | 2351          | 1.12 (0.98-1.27) | 1831           | 0.99 (0.84-1.15) | 1498                           | 1.05 (0.90-1.24) |
| Natural menopause at 56+ years                                                | -              | -                | 1147                           | 1.03 (0.86-1.24) | 1710          | 1.13 (0.97-1.31) | 1393           | 0.95 (0.80-1.13) | 1296                           | 0.95 (0.79-1.13) |
|                                                                               | p-trend = 0.1  |                  | p-trend = 5.4x10 <sup>-4</sup> |                  | p-trend = 0.8 |                  | p-trend = 0.05 |                  | p-trend = 0.02                 |                  |
| <b>FVC &lt; LLN – excluding HRT ever users</b>                                |                |                  |                                |                  |               |                  |                |                  |                                |                  |
| Natural menopause at <45 years                                                | 992            | 1.07 (0.87-1.32) | 332                            | 1.48 (1.11-1.98) | 361           | 1.34 (1.00-1.80) | 373            | 1.06 (0.79-1.44) | 508                            | 1.30 (1.02-1.67) |
| Natural menopause at 45-47 years                                              | 1656           | 1.09 (0.93-1.28) | 638                            | 1.03 (0.81-1.30) | 558           | 1.34 (1.04-1.71) | 474            | 0.92 (0.69-1.23) | 623                            | 1.12 (0.88-1.42) |
| Natural menopause at 48-53 years                                              | 7773           | Ref.             | 5189                           | Ref.             | 3881          | Ref.             | 2745           | Ref.             | 2859                           | Ref.             |
| Natural menopause at 54-55 years                                              | 573            | 0.80 (0.61-1.05) | 1765                           | 0.94 (0.80-1.11) | 1223          | 1.26 (1.05-1.52) | 845            | 0.91 (0.72-1.14) | 696                            | 0.89 (0.70-1.13) |
| Natural menopause at 56+ years                                                | -              | -                | 791                            | 1.03 (0.83-1.28) | 877           | 1.09 (0.88-1.36) | 621            | 0.84 (0.64-1.10) | 561                            | 0.78 (0.60-1.03) |
|                                                                               | p-trend = 0.05 |                  | p-trend = 0.08                 |                  | p-trend = 0.5 |                  | p-trend = 0.3  |                  | p-trend = 5.8x10 <sup>-4</sup> |                  |
| <b>FVC &lt; LLN – excluding HRT ever users and ever smokers</b>               |                |                  |                                |                  |               |                  |                |                  |                                |                  |
| Natural menopause at <45 years                                                | 613            | 0.86 (0.65-1.13) | 200                            | 1.65 (1.14-2.38) | 224           | 1.18 (0.80-1.74) | 214            | 0.91 (0.58-1.41) | 303                            | 1.07 (0.75-1.52) |
| Natural menopause at 45-47 years                                              | 1132           | 1.03 (0.84-1.25) | 422                            | 0.98 (0.72-1.31) | 346           | 1.07 (0.76-1.50) | 311            | 0.81 (0.55-1.19) | 412                            | 1.17 (0.87-1.59) |
| Natural menopause at 48-53 years                                              | 5537           | Ref.             | 3710                           | Ref.             | 2770          | Ref.             | 1891           | Ref.             | 2059                           | Ref.             |
| Natural menopause at 54-55 years                                              | 433            | 0.80 (0.58-1.09) | 1326                           | 1.02 (0.85-1.23) | 918           | 1.28 (1.02-1.59) | 613            | 0.90 (0.68-1.20) | 512                            | 0.90 (0.67-1.21) |
| Natural menopause at 56+ years                                                | -              | -                | 590                            | 1.03 (0.80-1.33) | 653           | 1.07 (0.83-1.39) | 465            | 0.74 (0.53-1.03) | 434                            | 0.71 (0.51-1.00) |
|                                                                               | p-trend = 0.7  |                  | p-trend = 0.4                  |                  | p-trend = 0.5 |                  | p-trend = 0.6  |                  | p-trend = 0.01                 |                  |
| <b>FVC &lt; LLN – excluding HRT ever users, ever smokers, and extreme BMI</b> |                |                  |                                |                  |               |                  |                |                  |                                |                  |
| Natural menopause at <45 years                                                | 454            | 0.97 (0.70-1.35) | 149                            | 1.62 (1.03-2.53) | 160           | 1.26 (0.77-2.04) | 147            | 0.70 (0.38-1.29) | 210                            | 1.13 (0.73-1.76) |
| Natural menopause at 45-47 years                                              | 885            | 1.01 (0.80-1.29) | 326                            | 1.10 (0.78-1.55) | 275           | 1.06 (0.70-1.59) | 236            | 0.96 (0.61-1.52) | 324                            | 1.18 (0.83-1.68) |
| Natural menopause at 48-53 years                                              | 4380           | Ref.             | 2953                           | Ref.             | 2153          | Ref.             | 1482           | Ref.             | 1608                           | Ref.             |
| Natural menopause at 54-55 years                                              | 341            | 0.72 (0.50-1.06) | 1055                           | 0.94 (0.75-1.18) | 705           | 1.34 (1.02-1.74) | 474            | 0.84 (0.59-1.19) | 386                            | 1.01 (0.71-1.43) |
| Natural menopause at 56+ years                                                | -              | -                | 446                            | 0.90 (0.66-1.24) | 473           | 1.17 (0.86-1.61) | 325            | 0.78 (0.51-1.18) | 326                            | 0.71 (0.48-1.07) |
|                                                                               | p-trend = 0.4  |                  | p-trend = 0.08                 |                  | p-trend = 0.3 |                  | p-trend = 0.9  |                  | p-trend = 0.04                 |                  |

Model 3: Adjusted for centre, age, ethnicity, standing height, Townsend deprivation index, age at menarche, oral contraceptive use, hormone replacement therapy use, number of live births, smoking status, pack-years, and body mass index. Reference group: Women with natural menopause at age 48-53. *P*-trend is from model with age at menopause as continuous variable.

**Supplementary table S8.** Association of airflow obstruction (FEV1/FVC<LLN) with age at natural menopause, by age group.

|                                                                                    | 40-55 years   |                  | 56-59 years    |                  | 60-62 years    |                  | 63-65 years    |                  | 66-70 years    |                  |
|------------------------------------------------------------------------------------|---------------|------------------|----------------|------------------|----------------|------------------|----------------|------------------|----------------|------------------|
|                                                                                    | N             | OR (95% CI)      | N              | OR (95% CI)      | N              | OR (95% CI)      | N              | OR (95% CI)      | N              | OR (95% CI)      |
| <b>FEV1/FVC &lt; LLN</b>                                                           |               |                  |                |                  |                |                  |                |                  |                |                  |
| Natural menopause at <45 years                                                     | 1976          | 1.21 (1.00-1.47) | 1041           | 1.25 (1.01-1.55) | 1053           | 1.19 (0.96-1.48) | 1010           | 1.14 (0.91-1.44) | 1000           | 1.00 (0.80-1.26) |
| Natural menopause at 45-47 years                                                   | 2324          | 1.12 (0.95-1.33) | 1282           | 0.89 (0.71-1.10) | 1297           | 1.05 (0.86-1.30) | 1105           | 1.23 (0.99-1.52) | 1284           | 0.99 (0.81-1.22) |
| Natural menopause at 48-53 years                                                   | 9788          | Ref.             | 8184           | Ref.             | 7309           | Ref.             | 5779           | Ref.             | 5743           | Ref.             |
| Natural menopause at 54-55 years                                                   | 703           | 1.04 (0.76-1.43) | 2612           | 0.85 (0.71-1.01) | 2351           | 1.05 (0.88-1.25) | 1831           | 1.08 (0.89-1.32) | 1498           | 0.94 (0.76-1.15) |
| Natural menopause at 56+ years                                                     | -             | -                | 1147           | 1.02 (0.80-1.29) | 1710           | 0.88 (0.71-1.09) | 1393           | 0.99 (0.79-1.24) | 1296           | 1.01 (0.8q-1.26) |
|                                                                                    | p-trend = 0.1 |                  | p-trend = 0.03 |                  | p-trend = 0.1  |                  | p-trend = 0.1  |                  | p-trend = 0.8  |                  |
| <b>FEV1/FVC &lt; LLN – excluding HRT ever users</b>                                |               |                  |                |                  |                |                  |                |                  |                |                  |
| Natural menopause at <45 years                                                     | 922           | 1.10 (0.84-1.44) | 332            | 1.25 (0.86-1.81) | 361            | 1.43 (1.00-2.05) | 373            | 1.17 (0.79-1.71) | 508            | 1.26 (0.92-1.71) |
| Natural menopause at 45-47 years                                                   | 1656          | 1.16 (0.94-1.42) | 638            | 0.85 (0.61-1.17) | 558            | 1.09 (0.79-1.51) | 474            | 1.39 (0.99-1.96) | 623            | 1.12 (0.84-1.50) |
| Natural menopause at 48-53 years                                                   | 7773          | Ref.             | 5189           | Ref.             | 3881           | Ref.             | 2745           | Ref.             | 2859           | Ref.             |
| Natural menopause at 54-55 years                                                   | 573           | 1.00 (0.70-1.43) | 1765           | 0.80 (0.64-1.01) | 1223           | 1.09 (0.85-1.41) | 845            | 1.13 (0.84-1.53) | 696            | 0.93 (0.69-1.27) |
| Natural menopause at 56+ years                                                     | -             | -                | 791            | 0.96 (0.71-1.31) | 877            | 0.75 (0.54-1.05) | 621            | 0.80 (0.54-1.18) | 561            | 0.97 (0.69-1.35) |
|                                                                                    | p-trend = 0.5 |                  | p-trend = 0.09 |                  | p-trend = 0.07 |                  | p-trend = 0.03 |                  | p-trend = 0.08 |                  |
| <b>FEV1/FVC &lt; LLN – excluding HRT ever users and ever smokers</b>               |               |                  |                |                  |                |                  |                |                  |                |                  |
| Natural menopause at <45 years                                                     | 613           | 1.09 (0.74-1.61) | 200            | 1.48 (0.88-2.49) | 224            | 1.10 (0.61-1.99) | 214            | 0.98 (0.50-1.92) | 303            | 0.92 (0.55-1.51) |
| Natural menopause at 45-47 years                                                   | 1132          | 1.14 (0.86-1.50) | 422            | 0.59 (0.34-1.00) | 346            | 1.28 (0.80-2.03) | 311            | 1.12 (0.67-1.90) | 412            | 1.03 (0.69-1.54) |
| Natural menopause at 48-53 years                                                   | 5537          | Ref.             | 3710           | Ref.             | 2770           | Ref.             | 1891           | Ref.             | 2059           | Ref.             |
| Natural menopause at 54-55 years                                                   | 433           | 1.05 (0.68-1.64) | 1326           | 0.89 (0.68-1.18) | 918            | 1.05 (0.75-1.47) | 613            | 1.10 (0.74-1.64) | 512            | 0.87 (0.59-1.29) |
| Natural menopause at 56+ years                                                     | -             | -                | 590            | 1.06 (0.74-1.53) | 653            | 0.82 (0.54-1.25) | 465            | 0.87 (0.54-1.42) | 434            | 0.90 (0.59-1.37) |
|                                                                                    | p-trend = 0.8 |                  | p-trend = 0.4  |                  | p-trend = 0.4  |                  | p-trend = 0.8  |                  | p-trend = 0.6  |                  |
| <b>FEV1/FVC &lt; LLN – excluding HRT ever users, ever smokers, and extreme BMI</b> |               |                  |                |                  |                |                  |                |                  |                |                  |
| Natural menopause at <45 years                                                     | 454           | 1.12 (0.73-1.70) | 149            | 1.50 (0.83-2.72) | 160            | 0.88 (0.43-1.77) | 147            | 1.29 (0.65-2.58) | 210            | 0.79 (0.43-1.43) |
| Natural menopause at 45-47 years                                                   | 885           | 1.04 (0.77-1.42) | 326            | 0.65 (0.37-1.16) | 275            | 1.30 (0.80-2.12) | 236            | 1.24 (0.71-2.18) | 324            | 0.99 (0.64-1.53) |
| Natural menopause at 48-53 years                                                   | 4380          | Ref.             | 2953           | Ref.             | 2153           | Ref.             | 1482           | Ref.             | 1608           | Ref.             |
| Natural menopause at 54-55 years                                                   | 341           | 1.08 (0.68-1.73) | 1055           | 0.82 (0.60-1.13) | 705            | 1.05 (0.73-1.51) | 474            | 1.08 (0.69-1.67) | 386            | 0.90 (0.59-1.37) |
| Natural menopause at 56+ years                                                     | -             | -                | 446            | 1.17 (0.79-1.73) | 473            | 0.86 (0.55-1.34) | 325            | 0.94 (0.55-1.60) | 326            | 0.80 (0.49-1.29) |
|                                                                                    | p-trend = 0.8 |                  | p-trend = 0.6  |                  | p-trend = 0.7  |                  | p-trend = 0.5  |                  | p-trend = 0.6  |                  |

Model 3: Adjusted for centre, age, ethnicity, standing height, Townsend deprivation index, age at menarche, oral contraceptive use, hormone replacement therapy use, number of live births, smoking status, pack-years, and body mass index. Reference group: Women with natural menopause at age 48-53. P-trend is from model with age at menopause as continuous variable.

**Supplementary table S9.** Association of lung function with age at hysterectomy, by age group, among women who have never taken HRT.

|                                  | 40-55 years   |                     | 56-59 years   |                     | 60-62 years    |                     | 63-65 years   |                     | 66-70 years   |                     |
|----------------------------------|---------------|---------------------|---------------|---------------------|----------------|---------------------|---------------|---------------------|---------------|---------------------|
|                                  | N             | Difference (95% CI) | N             | Difference (95% CI) | N              | Difference (95% CI) | N             | Difference (95% CI) | N             | Difference (95% CI) |
| <b>FVC (mL)</b>                  |               |                     |               |                     |                |                     |               |                     |               |                     |
| Hysterectomy at < 45 years       | 1424          | 8 (-25, 41)         | 421           | -32 (-78, 14)       | 339            | -44 (-94, 6)        | 303           | -47 (-99, 5)        | 331           | -19 (-70, 32)       |
| Hysterectomy at 45-47 years      | 271           | -46 (-104, 12)      | 119           | -109 (-193, -25)    | 79             | -26 (-126, 73)      | 82            | -66 (-162, 30)      | 95            | 19 (-72, 111)       |
| Natural menopause at 48-53 years | 7773          | Ref.                | 5189          | Ref.                | 3881           | Ref.                | 2745          | Ref.                | 2859          | Ref.                |
| Hysterectomy at 48-53 years      | 173           | -19 (-89, 52)       | 87            | -8 (-106, 90)       | 90             | -51 (-144, 43)      | 65            | -11 (-118, 96)      | 75            | 12 (-90, 115)       |
| Hysterectomy at 54-55 years      | 7             | 45 (-300, 391)      | 15            | -9 (-243, 235)      | 9              | 83 (-210, 375)      | 5             | 91 (-290, 473)      | 6             | 99 (-258, 456)      |
| Hysterectomy at 56+ years        | -             | -                   | 7             | -40 (-382, 303)     | 6              | -276 (-634, 83)     | 11            | -102 (-360, 156)    | 15            | 43 (-183, 269)      |
|                                  | p-trend = 1.0 |                     | p-trend = 0.5 |                     | p-trend = 1.0  |                     | p-trend = 0.2 |                     | p-trend = 0.2 |                     |
| <b>FEV1 (mL/s)</b>               |               |                     |               |                     |                |                     |               |                     |               |                     |
| Hysterectomy at < 45 years       | 1424          | 9 (-18, 37)         | 421           | -33 (-71, 6)        | 339            | -31 (-73, 10)       | 303           | -39 (-83, 5)        | 331           | -7 (-50, 36)        |
| Hysterectomy at 45-47 years      | 271           | -31 (-79, 18)       | 119           | -81 (-151, -10)     | 79             | 2 (-82, 85)         | 82            | -59 (-140, 23)      | 95            | 42 (-35, 119)       |
| Natural menopause at 48-53 years | 7773          | Ref.                | 5189          | Ref.                | 3881           | Ref.                | 2745          | Ref.                | 2859          | Ref.                |
| Hysterectomy at 48-53 years      | 173           | -27 (-86, 33)       | 87            | -10 (-92, 72)       | 90             | -31 (-109, 48)      | 65            | -8 (-99, 83)        | 75            | 40 (-47, 126)       |
| Hysterectomy at 54-55 years      | 7             | 93 (-198, 383)      | 15            | -7 (-202, 189)      | 9              | 64 (-181, 309)      | 5             | 80 (-245, 405)      | 6             | 85 (-216, 385)      |
| Hysterectomy at 56+ years        | -             | -                   | 7             | -13 (-300, 274)     | 6              | -153 (-453, 148)    | 11            | -55 (-274, 165)     | 15            | 85 (-105, 276)      |
|                                  | p-trend = 0.7 |                     | p-trend = 0.5 |                     | p-trend = 0.8  |                     | p-trend = 0.2 |                     | p-trend = 0.1 |                     |
|                                  | <b>N</b>      | <b>OR (95% CI)</b>  | <b>N</b>      | <b>OR (95% CI)</b>  | <b>N</b>       | <b>OR (95% CI)</b>  | <b>N</b>      | <b>OR (95% CI)</b>  | <b>N</b>      | <b>OR (95% CI)</b>  |
| <b>FVC&lt;LLN</b>                |               |                     |               |                     |                |                     |               |                     |               |                     |
| Hysterectomy at < 45 years       | 1424          | 0.90 (0.74-1.10)    | 421           | 1.04 (0.78-1.37)    | 339            | 1.54 (1.15-2.07)    | 303           | 1.21 (0.87-1.67)    | 331           | 1.12 (0.82-1.52)    |
| Hysterectomy at 45-47 years      | 271           | 1.20 (0.86-1.67)    | 119           | 1.01 (0.61-1.67)    | 79             | 0.72 (0.35-1.48)    | 82            | 1.38 (0.77-2.47)    | 95            | 0.80 (0.43-1.50)    |
| Natural menopause at 48-53 years | 7773          | Ref.                | 5189          | Ref.                | 3881           | Ref.                | 2745          | Ref.                | 2859          | Ref.                |
| Hysterectomy at 48-53 years      | 173           | 1.16 (0.76-1.75)    | 87            | 0.63 (0.33-1.23)    | 90             | 0.82 (0.42-1.60)    | 65            | 1.26 (0.62-2.53)    | 75            | 0.84 (0.42-1.65)    |
| Hysterectomy at 54-55 years      | 7             | 0.95 (0.11-8.06)    | 15            | 0.94 (0.24-3.63)    | 9              | 0.96 (0.14-6.41)    | 5             | 1.00 (1.00-1.00)    | 6             | 1.40 (0.15-12.65)   |
| Hysterectomy at 56+ years        | -             | -                   | 7             | 0.91 (0.11-7.88)    | 6              | 3.18 (0.54-18.70)   | 11            | 2.28 (0.58-8.96)    | 15            | 1.00 (1.00-1.00)    |
|                                  | p-trend = 0.3 |                     | p-trend = 0.7 |                     | p-trend = 0.07 |                     | p-trend = 0.2 |                     | p-trend = 0.9 |                     |
| <b>FEV1/FVC&lt;LLN</b>           |               |                     |               |                     |                |                     |               |                     |               |                     |
| Hysterectomy at < 45 years       | 1424          | 0.98 (0.76-1.28)    | 421           | 1.34 (0.94-1.90)    | 339            | 1.01 (0.65-1.57)    | 303           | 1.09 (0.67-1.77)    | 331           | 0.93 (0.61-1.43)    |
| Hysterectomy at 45-47 years      | 271           | 0.88 (0.53-1.45)    | 119           | 0.97 (0.47-2.00)    | 79             | 1.64 (0.76-3.57)    | 82            | 0.83 (0.32-2.17)    | 95            | 0.38 (0.13-1.10)    |
| Natural menopause at 48-53 years | 7773          | Ref.                | 5189          | Ref.                | 3881           | Ref.                | 2745          | Ref.                | 2859          | Ref.                |
| Hysterectomy at 48-53 years      | 173           | 1.47 (0.88-2.44)    | 87            | 1.66 (0.81-3.38)    | 90             | 0.87 (0.36-2.12)    | 65            | 0.92 (0.31-2.66)    | 75            | 0.63 (0.24-1.67)    |
| Hysterectomy at 54-55 years      | 7             | 1.00 (1.00-1.00)    | 15            | 1.00 (1.00-1.00)    | 9              | 3.11 (0.37-26.11)   | 5             | 1.00 (1.00-1.00)    | 6             | 2.08 (0.22-19.86)   |
| Hysterectomy at 56+ years        | -             | -                   | 7             | 1.00 (1.00-1.00)    | 6              | 1.00 (1.00-1.00)    | 11            | 1.00 (1.00-1.00)    | 15            | 0.71 (0.09-5.64)    |
|                                  | p-trend = 0.1 |                     | p-trend = 0.6 |                     | p-trend = 0.7  |                     | p-trend = 0.2 |                     | p-trend = 0.2 |                     |

Model 3: Adjusted for centre, age, ethnicity, standing height, Townsend deprivation index, age at menarche, oral contraceptive use, HRT use, number of live births, smoking status, pack-years, and body mass index. Ref. group: Women with natural menopause at age 48-53. P-trend is from model with age at hysterectomy as continuous variable.

**Supplementary table S10.** Association of lung function with age at oophorectomy + hysterectomy, by age group, among women who have never taken HRT.

|                                   | 40-55 years |                           | 56-59 years |                           | 60-62 years |                           | 63-65 years |                           | 66-70 years |                           |
|-----------------------------------|-------------|---------------------------|-------------|---------------------------|-------------|---------------------------|-------------|---------------------------|-------------|---------------------------|
|                                   | N           | Difference/OR<br>(95% CI) |
| <b>FVC (mL)</b>                   |             |                           |             |                           |             |                           |             |                           |             |                           |
| Oophor.+hysterect. at < 45 years  | 82          | -55 (-168, 58)            | 15          | 71 (-165, 307)            | 20          | -54 (-250, 141)           | 36          | -74 (-218, 70)            | 41          | -179 (-317, -40)          |
| Oophor.+hysterect. at 45-47 years | 65          | 70 (-46, 185)             | 13          | -91 (-345, 162)           | 9           | -167 (-459, 124)          | 8           | -87 (-391, 217)           | 18          | -57 (-264, 150)           |
| Natural menopause at 48-53 years  | 7773        | Ref.                      | 5189        | Ref.                      | 3881        | Ref.                      | 2745        | Ref.                      | 2859        | Ref.                      |
| Oophor.+hysterect. at 48-53 years | 247         | -55 (-116, 7)             | 121         | 20 (-64, 104)             | 94          | 87 (-5, 178)              | 80          | -77 (-175, 21)            | 151         | -2 (-75, 72)              |
| Oophor.+hysterect. at 54-55 years | 2           | -622 (-1267, 24)          | 7           | -391 (-736, -47)          | 7           | 115 (-215, 445)           | 5           | -54 (-439, 330)           | 7           | 272 (-59, 603)            |
| Oophor.+hysterect. at 56+ years   | -           | -                         | 14          | 140 (-104, 383)           | 22          | -1 (-188, 188)            | 15          | -160 (-383, 63)           | 32          | -69 (-225, 87)            |
|                                   |             | p-trend = 0.5             |             | p-trend = 0.5             |             | p-trend = 0.9             |             | p-trend = 1.0             |             | p-trend = 0.2             |
| <b>FEV1 (mL/s)</b>                |             |                           |             |                           |             |                           |             |                           |             |                           |
| Oophor.+hysterect. at < 45 years  | 82          | -16 (-111, 79)            | 15          | 17 (-181, 215)            | 20          | -28 (-191, 136)           | 36          | -62 (-185, 60)            | 41          | -114 (-231, 3)            |
| Oophor.+hysterect. at 45-47 years | 65          | 91 (-6, 189)              | 13          | -70 (-282, 142)           | 9           | -101 (-345, 143)          | 8           | -78 (-336, 179)           | 18          | 0 (-175, 174)             |
| Natural menopause at 48-53 years  | 7773        | Ref.                      | 5189        | Ref.                      | 3881        | Ref.                      | 2745        | Ref.                      | 2859        | Ref.                      |
| Oophor.+hysterect. at 48-53 years | 247         | -33 (-85, 19)             | 121         | 21 (-49, 92)              | 94          | 76 (-1, 152)              | 80          | -60 (-143, 22)            | 151         | 24 (-38, 86)              |
| Oophor.+hysterect. at 54-55 years | 2           | -463 (-1007, 81)          | 7           | -271 (-559, 17)           | 7           | 79 (-197, 355)            | 5           | -100 (-426, 225)          | 7           | 229 (-51, 508)            |
| Oophor.+hysterect. at 56+ years   | -           | -                         | 14          | 159 (-45, 363)            | 22          | 36 (-120, 192)            | 15          | -109 (-298, 80)           | 32          | -40 (-171, 92)            |
|                                   |             | p-trend = 0.3             |             | p-trend = 0.7             |             | p-trend = 0.7             |             | p-trend = 0.7             |             | p-trend = 0.5             |
|                                   | <b>N</b>    | <b>OR (95% CI)</b>        |
| <b>FVC&lt;LLN</b>                 |             |                           |             |                           |             |                           |             |                           |             |                           |
| Oophor.+hysterect. at < 45 years  | 82          | 1.91 (1.05-3.49)          | 15          | 0.36 (0.05-2.84)          | 20          | 1.30 (0.40-4.15)          | 36          | 1.89 (0.87-4.09)          | 41          | 2.03 (0.98-4.21)          |
| Oophor.+hysterect. at 45-47 years | 65          | 0.59 (0.26-1.33)          | 13          | 1.41 (0.30-6.70)          | 9           | 3.01 (0.64-14.25)         | 8           | 1.19 (0.19-7.29)          | 18          | 1.28 (0.39-4.15)          |
| Natural menopause at 48-53 years  | 7773        | Ref.                      | 5189        | Ref.                      | 3881        | Ref.                      | 2745        | Ref.                      | 2859        | Ref.                      |
| Oophor.+hysterect. at 48-53 years | 247         | 1.22 (0.87-1.72)          | 121         | 0.81 (0.47-1.37)          | 94          | 0.51 (0.25-1.03)          | 80          | 1.29 (0.70-2.37)          | 151         | 0.85 (0.53-1.36)          |
| Oophor.+hysterect. at 54-55 years | 2           | 9.57 (0.57-161.05)        | 7           | 8.24 (1.69-40.13)         | 7           | 1.17 (0.13-10.51)         | 5           | 2.70 (0.33-21.79)         | 7           | 0.53 (0.04-6.49)          |
| Oophor.+hysterect. at 56+ years   | -           | -                         | 14          | 0.86 (0.18-4.04)          | 22          | 1.64 (0.54-5.02)          | 15          | 1.47 (0.41-5.20)          | 32          | 0.71 (0.24-2.08)          |
|                                   |             | p-trend = 0.2             |             | p-trend = 0.9             |             | p-trend = 0.8             |             | p-trend = 0.1             |             | p-trend = 0.1             |
| <b>FEV1/FVC&lt;LLN</b>            |             |                           |             |                           |             |                           |             |                           |             |                           |
| Oophor.+hysterect. at < 45 years  | 82          | 1.92 (1.05-3.49)          | 15          | 0.36 (0.05-2.84)          | 20          | 1.30 (0.40-4.15)          | 36          | 1.89 (0.87-4.09)          | 41          | 2.03 (0.98-4.21)          |
| Oophor.+hysterect. at 45-47 years | 65          | 0.59 (0.26-1.33)          | 13          | 1.41 (0.30-6.70)          | 9           | 3.01 (0.64-14.25)         | 8           | 1.19 (0.19-7.29)          | 18          | 1.28 (0.39-4.15)          |
| Natural menopause at 48-53 years  | 7773        | Ref.                      | 5189        | Ref.                      | 3881        | Ref.                      | 2745        | Ref.                      | 2859        | Ref.                      |
| Oophor.+hysterect. at 48-53 years | 247         | 1.22 (0.87-1.72)          | 121         | 0.81 (0.47-1.37)          | 94          | 0.51 (0.25-1.03)          | 80          | 1.29 (0.70-2.37)          | 151         | 0.85 (0.53-1.36)          |
| Oophor.+hysterect. at 54-55 years | 2           | 9.57 (0.57-161.05)        | 7           | 8.24 (1.69-40.13)         | 7           | 1.17 (0.13-10.51)         | 5           | 2.70 (0.33-21.79)         | 7           | 0.53 (0.04-6.49)          |
| Oophor.+hysterect. at 56+ years   | -           | -                         | 14          | 0.86 (0.18-4.04)          | 22          | 1.64 (0.54-5.02)          | 15          | 1.47 (0.41-5.20)          | 32          | 0.71 (0.24-2.08)          |
|                                   |             | p-trend = 0.2             |             | p-trend = 0.8             |             | p-trend = 0.8             |             | p-trend = 0.1             |             | p-trend = 0.1             |

Model 3: Adjusted for centre, age, ethnicity, standing height, Townsend deprivation index, age at menarche, oral contraceptive use, HRT use, number of live births, smoking status, pack-years, and body mass index. Ref. group: Women with natural menopause at age 48-53. P-trend is from model with age at hysterectomy as continuous variable.
